# Supplementary material for: Heat Release by Isolated Mouse Brain Mitochondria Detected with Diamond Thermometer
Source: MDPI journal article supplement (doi:10.3390/nano13010098), 2022-12-25
Supplement: s1 [file s1]

# Heat release by isolated mouse brain mitochondria detected with diamond thermometer

## Supplementary information

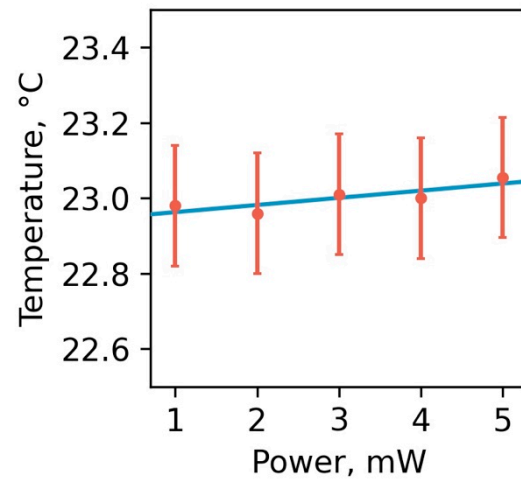

**Figure S1.** A power dependence of the temperature detected by DT in the dish without mitochondria. The indicated power is measured before fiber input.

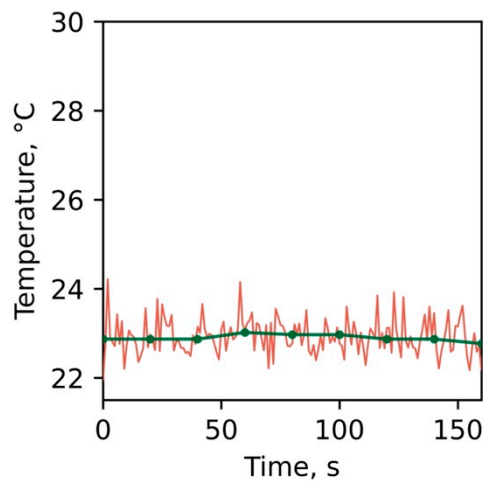

**Figure S2.** A control time-track of the temperature in the dish without mitochondria.
